# Supplementary material
Source: publisher figshare collection journal article supplement (https://acs.figshare.com/ndownloader/files/4234000)
Supplement: Supplementary file 1 [file 4234000]

# Separated Carbon Nanotube Macroelectronics for Active Matrix Organic Light-Emitting Diode Displays

Jialu Zhang<sup>†,§</sup>, Yue Fu<sup>†,§</sup>, Chuan Wang<sup>†,§</sup>, Po-Chiang Chen<sup>§</sup>, Zhiwei Liu<sup>‡</sup>, Wei Wei<sup>‡</sup>, Chao Wu<sup>‡</sup>,  
Mark E. Thompson<sup>‡</sup>, and Chongwu Zhou<sup>\*,§</sup>

<sup>§</sup>Department of Electrical Engineering and <sup>‡</sup>Department of Chemistry, University of Southern California, Los Angeles, California 90089, United States

\* Corresponding author: [chongwuz@usc.edu](mailto:chongwuz@usc.edu).

[†] These authors contributed equally to this work.

## Supporting Information

### 1. AFM image of the APTES coated SiO<sub>2</sub> surface

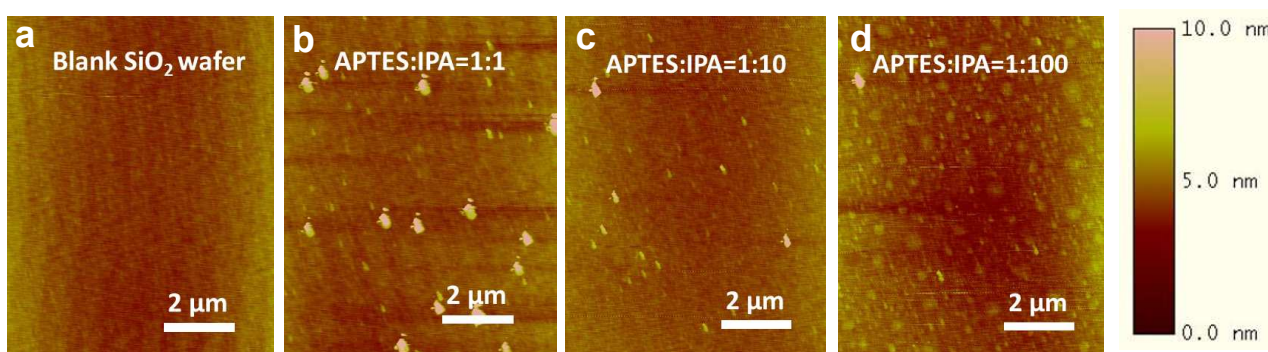

**Figure S1.** AFM image of SiO<sub>2</sub> surface coated with APTES solution with different concentration. (a) Blank SiO<sub>2</sub> surface. (b-d) SiO<sub>2</sub> surface functionalized with solution of APTES and IPA volume ratio of 1:1, 1:10 and 1:100, respectively. From the images, one can find that the SiO<sub>2</sub> surface in Figure S1b has many impurities, while the one in Figure S1d shows that APTES did not cover the whole surface.

## 2. Separated nanotube thin-film on $\text{Al}_2\text{O}_3$ and $\text{Al}_2\text{O}_3/\text{SiO}_2$ film

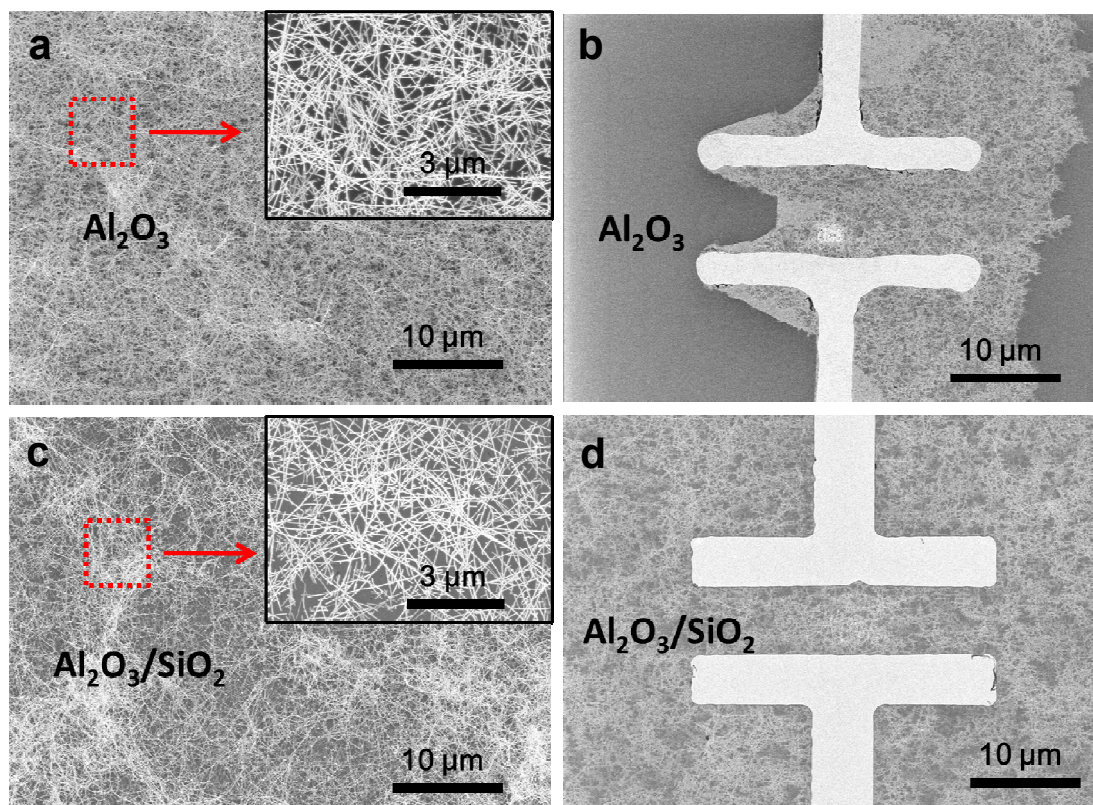

**Figure S2.** (a,c) SEM images of the separated nanotube thin-films deposited on  $\text{Al}_2\text{O}_3$  and  $\text{Al}_2\text{O}_3/\text{SiO}_2$  surface, respectively (b,d) SEM images for the same samples after one step of photolithography. Nanotubes on the  $\text{Al}_2\text{O}_3$  sample would peel off while the ones on  $\text{Al}_2\text{O}_3/\text{SiO}_2$  bilayer dielectric still stick to the surface.

## 3. Two terminal measurement of the OLED

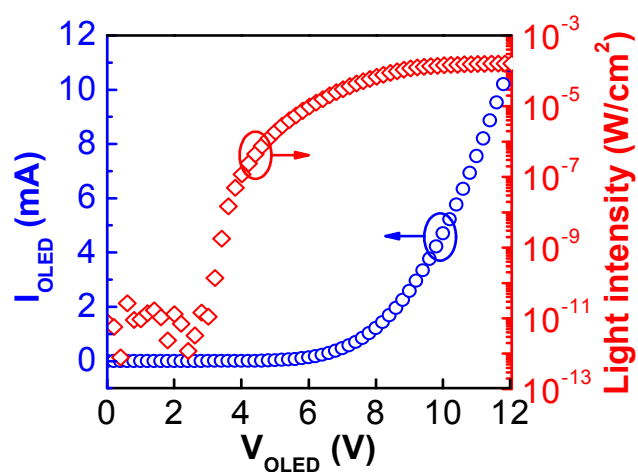

**Figure S3.** Two terminal measurement of the OLED showing the current through the OLED ( $I_{\text{OLED}}$ ) (red line) and OLED light intensity (green line) versus the voltage applied across the OLED ( $V_{\text{OLED}}$ ).
